# Supplementary material for: The triglyceride-glucose index is inversely associated with atrial fibrillation in patients with hypertrophic cardiomyopathy: evidence from a cross-sectional study
Source: Research Square preprint supplement (doi:10.21203/rs.3.rs-8042387/v1), 2025-12-01
Supplement: Supplementary file 1 [file c020d5abd88e55acd0187f2b.xlsx]

## Sheet: Supplemental Table 1  (2)
	Table S1. Collinearity diagnostics among variables included in the regression model.
		Tolerance	VIF
	Model 1
	age(years)	0.667	1.5
	Hypertension, n (%)	0.727	1.376
	Dyslipidemia, n (%)	0.806	1.241
	Diabetes mellitus, n (%)	0.791	1.265
	BMI	0.749	1.335
	Left atrium diameter (mm)	0.84	1.19
	LVEDD	0.743	1.346
	LVPWT	0.905	1.104
	LVEF	0.11	9.097
	LVFS	0.113	8.87
	Moderate or severe MR	0.831	1.203
	TyG index	0.705	1.418
	FFA	0.953	1.049
	eGFR(CKD-EPI)	0.725	1.379
	Model 2
	age(years)	0.929	1.076
	Diabetes mellitus, n (%)	0.798	1.253
	LAD	0.96	1.042
	LVFS	0.986	1.014
	TyG index	0.802	1.247
